# Supplementary material for: One-step preparation of mirror-like NiS nanosheets on ITO for the efficient counter electrode of dye-sensitized solar cells
Source: Royal Society of Chemistry journal article supplement (doi:10.1039/c4cc03798g), 2014-07-04
Supplement: c4cc03798g1.pdf [file c4cc03798g1.pdf]

## Electronic Supplementary Information

### One-step preparation of mirror-like NiS nanosheets on ITO for the efficient counter electrode of dye-sensitized solar cells

Xun Sun,<sup>a, b</sup> Jie Dou,<sup>a, b</sup> Fengyan Xie,<sup>a, b</sup> Yafeng Li,<sup>a, b, c</sup> Mingdeng Wei\*,<sup>a, b</sup>

<sup>a</sup> State Key Laboratory of Photocatalysis on Energy and Environment, Fuzhou University, Fuzhou, Fujian 350002, China

<sup>b</sup> Institute of Advanced Energy Materials, Fuzhou University, Fuzhou, Fujian 350002, China

<sup>c</sup> State Key Laboratory of Structural Chemistry, Fujian Institute of Research on the Structure of Matter, Chinese Academy of Sciences, Fuzhou, Fujian 350002, China

#### **Experimental**

**Synthesis of NiS CE:** In a typical synthesis, 0.5 mmol of NiCl<sub>2</sub>·6H<sub>2</sub>O, 1 mmol of D-penicillamine were dissolved in 40 mL of ethylene glycol under stirring for 10 min. The reaction mixture was then transferred into a Teflon-lined autoclave with 50 mL inner volume and a ITO substrate was dipped into it. The autoclave was then sealed and kept at 200 °C for 1 h in an electric oven. After cooling down to room temperature, the ITO substrate was washed several times with deionized water and ethanol, and dried at 70 °C. Then, the NiS CE was obtained. Transparent Pt CE was prepared by drop casting 5 mM H<sub>2</sub>PtCl<sub>6</sub> isopropyl alcohol solution on a clean FTO and sintered at 400 °C for 20 min.

**Fabrication of the DSCs:** Fabrication of the DSCs was executed by screen-printing method on FTO using the commercially available TiO<sub>2</sub> nanopowder (Sigma Aldrich, < 25 nm) with ethyl cellulose (10 wt%) and a solution composed of ethanol and  $\alpha$ -terpineol (5 wt%), followed by calcination at 525 °C for 2 h. The thickness of TiO<sub>2</sub> film was about 12  $\mu$ m. The electrode was dipped

into a solution containing 0.5 mM N719 dye in acetonitrile and isopropyl alcohol (v/v=1:1) for 24 h. After sensitization, the TiO<sub>2</sub> electrode was incorporated into a thin-layer, sandwiched solar cell with an active area of 0.25 cm<sup>2</sup> using NiS as CE. The performance of prepared transparent Pt CE was also measured for the comparison. These electrodes were separated by a polyethylene spacer (38 μm) to prevent short-circuiting. The electrolyte consisted of 0.05 M I<sub>2</sub>, 0.1 M LiI and 0.6 M 1,2-dimethyl-3-n-propylimidazolium iodide in acetonitrile with 0.5 M 4-tertbutylpyridine.

***Measurements of photovoltaic properties:*** The photovoltaic performance of solar cells was carried out using a source meter (Keithley 2400). A PEC-L11 AM 1.5 solar simulator (Pecell, with a 1000 W Xe lamp and an AM1.5 filter) was used as the light source (100 mW cm<sup>-2</sup>). Action spectra of the monochromatic IPCE were collected using a PEC-S20 (Pecell). The incident light intensity was calibrated according to a standard for amorphous silicon solar cells that was produced by the Japan Quality Assurance Organization. XRD pattern was characterized by using X-ray diffraction instrument (Axios Petro, PANalytical, CoKα, λ=1.79021Å). X-ray photoelectron spectra (XPS) were recorded using a MUTILLAB 2000. SEM images were presented using an S4800 instrument (Hitachi) with an accelerated voltage of 5 kV, and EDS spectrum was measured with an accelerated voltage of 15kV. TEM images were taken using a Tecnai G2 F20 S-TWIN with an accelerated voltage of 200 kV. Current-Voltage curves (CV), electrochemical impedance spectroscopy (EIS) and Tafel polarization curves were conducted using an IM6 (Zahner). Diffuse reflection spectra (DRS) were investigated using a UV-Vis-NIR diffuse reflectance spectroscopy (Varian CARY 500) with BaSO<sub>4</sub> as the background.

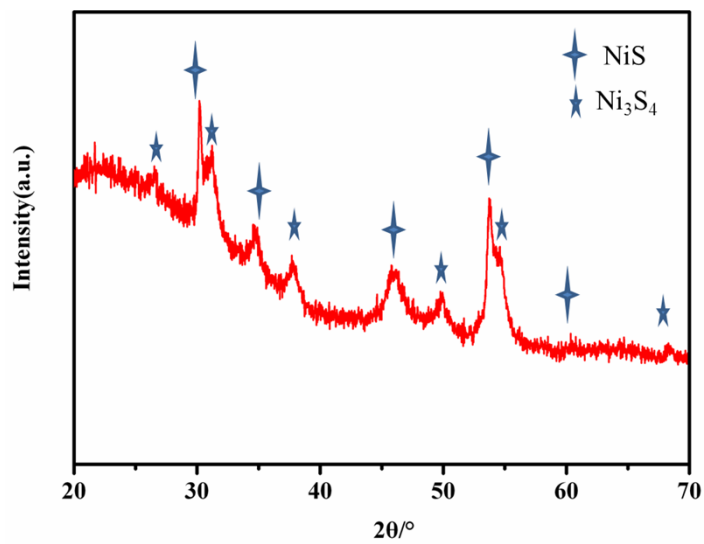

**Fig.S1** XRD patterns of the product fabricated in ethylene glycol solution at 200 °C

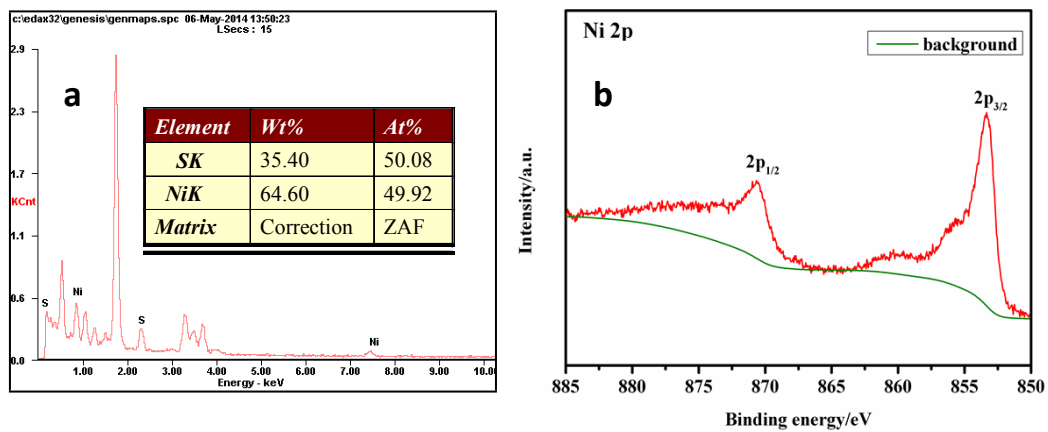

**Fig.S2** (a) EDS spectrum and (b) XPS spectrum of as-prepared NiS on ITO glass substrate.

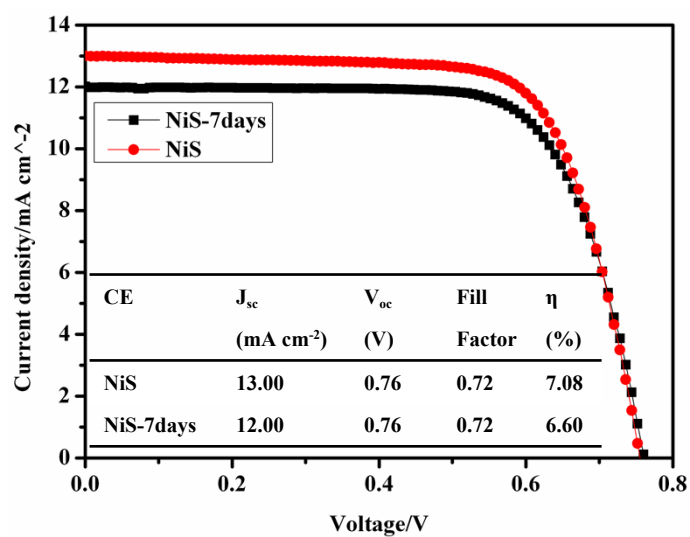

**Fig. S3** Current-voltage characteristics of as-prepared NiS CE and NiS CE that aging for one week.

Long-term stability of as-prepared counter electrodes were also tested. In Fig. S3, after aging for one week, the NiS CE can still keep an efficiency of 6.60%, which is 93.2% of the efficiency for fresh as-prepared NiS CE.

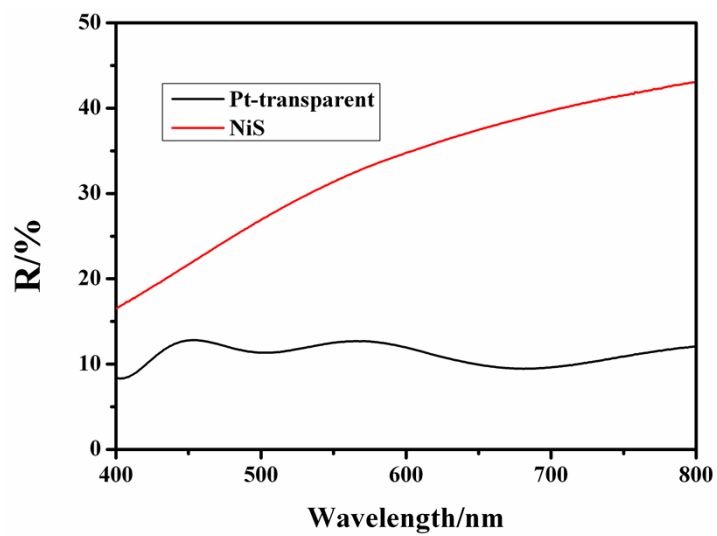

**Fig. S4** Diffuse reflectance spectra of as-prepared NiS CE and transparent Pt CE
